## RESEARCH ARTICLE

# The impact of newly synthesized sulfonamides on soil microbial population and respiration in rhizospheric soil of wheat (*Triticum aestivum* L.)

Ammara Saleem<sup>1</sup>, Asma Zulfiqar<sup>1\*</sup>, Muhammad Zeeshan Arshed<sup>1</sup>, Saber Hussain<sup>1</sup>, Muhammad Tajammal Khan<sup>2</sup>, Marek Zivcak<sup>3</sup>, Ali Tan Kee Zuan<sup>4\*</sup>, Shrouq M. Alshahrani<sup>5</sup>, Khaloud Mohammed Alarjani<sup>5</sup>

**1** Molecular Plant Physiology, Institute of Botany, University of the Punjab, Lahore, Pakistan, **2** Department of Botany, Division of Science and Technology, University of Education, Lahore, Pakistan, **3** Institute of Plant and Environmental Sciences, Slovak University of Agriculture, Nitra, Slovakia, **4** Department of Land Management, Faculty of Agriculture, Universiti Putra Malaysia, UPM Serdang, Selangor, Malaysia, **5** Department of Botany and Microbiology, College of Science, King Saud University, Riyadh, Saudi Arabia

\* asma.botany@pu.edu.pk (AZ); tkz@upm.edu.my (ATKZ)

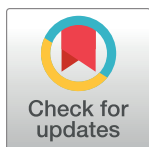

## OPEN ACCESS

**Citation:** Saleem A, Zulfiqar A, Arshed MZ, Hussain S, Khan MT, Zivcak M, et al. (2022) The impact of newly synthesized sulfonamides on soil microbial population and respiration in rhizospheric soil of wheat (*Triticum aestivum* L.). PLoS ONE 17(4): e0264476. <https://doi.org/10.1371/journal.pone.0264476>

**Editor:** Rahul Datta, Mendel University of Agriculture and Forestry: Mendelova univerzita v Brne, CZECH REPUBLIC

**Received:** December 17, 2021

**Accepted:** February 10, 2022

**Published:** April 28, 2022

**Copyright:** © 2022 Saleem et al. This is an open access article distributed under the terms of the [Creative Commons Attribution License](https://creativecommons.org/licenses/by/4.0/), which permits unrestricted use, distribution, and reproduction in any medium, provided the original author and source are credited.

**Data Availability Statement:** All relevant data are within the paper.

**Funding:** The authors extend their appreciation to the Researchers supporting project number (RSP-2021/185), King Saud University, Riyadh, Saudi Arabia. There was no additional external funding received for this study. The funders provided support in the form of salaries for authors SMA and KMA but did not have any additional role in the

## Abstract

Antibiotics released into agricultural fields through the manure of grazing animals could exert harmful impacts on soil microbes and plants. Antibiotics exert high impacts on environment than other pharmaceuticals due to their higher biological activity. However, little is known about their impacts on plants, despite indications that antibiotics exert negative effects on soil microorganisms, which ultimately harm the plants. It has been demonstrated that beneficial microorganisms promote plant growth and development under various stresses. This study evaluated the toxicity of four newly derived sulfonamides (SAs), i.e., 2-(phenylsulfonyl) hydrazine carbothioamide (TSBS-1), N, 2-bis phenyl hydrazine carbothioamide (TSBS-2), aminocarbonyl benzene sulfonamide (UBS-1), and N, N'-carbonyl dibenzene sulfonamide (UBS-2) on bacterial growth and soil microbial respiration. Each SA was tested at four different concentrations (i.e., 2.25, 2.5, 3, 4 mg/ml) against five rhizospheric bacterial strains, including AC (*Actinobacteria* sp.), RS-3a (*Bacillus* sp.), RS-7a (*Bacillus subtilis*), RS-4a (*Enterobacter* sp.), and RS-5a (*Enterobacter* sp.). Antimicrobial activity was checked by disc diffusion method, which showed that inhibition zone increased with increasing concentration of SAs. The UBS-1 resulted in the highest inhibition zone (11.47 ± 0.90 mm) against RS-4a with the highest concentration (4 mg/ml). Except TSBS-1, all sulfonamide derivatives reduced CO<sub>2</sub> respiration rates in soil. Soil respiration values significantly increased till 6<sup>th</sup> day; however, exposure of sulfonamide derivatives suppressed microbial respiration after 6<sup>th</sup> day. On the 20<sup>th</sup> day, poor respiration activity was noted at 0.23, 0.2, and 0.4 (CO<sub>2</sub> mg/g dry soil) for TSBS-1, UBS-1, and UBS-2, respectively. Our results demonstrate that sulfonamides, even in small concentrations, significantly affect soil microbial population and respiration. Soil microbial respiration changes mediated by sulfonamides were dependent on length of exposure and concentration. It is recommended that antibiotics

study design, data collection and analysis, decision to publish, or preparation of the manuscript.

**Competing interests:** The authors have declared that no competing interests exist.

should be carefully watched and their impact on plant growth should be tested in the future studies.

## Introduction

Antibiotics exert varying impacts on bacteria, algae, and other microbes. Initially, any agent with biological activity against living organisms was regarded as an antibiotic. However, now it exclusively refers to the compounds that have antibacterial, antifungal, or antiparasitic properties [1]. The use of various antibiotics on humans and animals can lead to environmental pollution. Antibiotic metabolites have been found in soil, manures, sediments, industrial waste, groundwater, surface water, and drinking water [2, 3]. When animal dung containing excreted antibiotics is used as plant food, these chemicals are released into the environment [4]. Sulfonamide is widely used in livestock farming and has been used to treat a variety of bacterial diseases. Due to poor management, they are excreted into the soil after treatments and these are extremely hazardous [5].

Unlikely, pesticides on farming land and antibiotics are not getting much consideration as environmental pollutants yet [6]. Different antibiotics are exposed to the environment in very different ways [7]. Sulfonamides may impair the growth of plants, leaves, and roots at concentrations of several hundred mg/L [8].

Antibiotic residues pose negative impacts to microbial processes in the environment [9]. Antibiotic output continues to increase, with total annual use rising from 100,000 to 200,000 tones globally [10]. India, China, and Pakistan are the top antibiotic consumers among poor and middle-income countries of the world [11]. Fluoroquinolones and sulfonamides are two antibiotic families found in high amounts in feces [12, 13].

Wheat (*Triticum aestivum* L.) is one of the world's most important food crops [14], grown worldwide in several cropping regions [15]. The global wheat production during 2020–2021 was over 768.9 million metric tons [16]. Future predictions suggest that there will be an increased demand for wheat (by 60% of the current production) till 2050 to feed an estimated 9.7 billion population in the world. Therefore, global importance of wheat is the best justification for conducting research on rhizospheric microbiome recognition and their activity in the rhizospheric soil of wheat cultivars [9]. The rhizosphere of wheat plants is highly diverse and thirty OTUs has been detected, including *Alphaproteobacteria*, *Betaproteobacteria*, *Deltaproteobacteria*, *Gammaproteobacteria*, *Actinobacteria*, *Bacilli*, *Clostridia*, and uncultivable bacteria [17]. The global importance of wheat necessitates the recognition of rhizospheric microbiome of the most popular wheat cultivars. The selection of best-quality cultivars is a key element as it creates a possibility of cultivation of high-quality wheat varieties in a specific field and climatic zone [18].

Maintaining a high crop yield is crucial for profit and food supply for global population. Plant growth-promoting organisms have attracted significant interest recently because of their potential to help plants growth under adverse conditions. Plant growth-promoting organisms use a variety of processes to promote root growth and development. These organisms in the rhizosphere can assist plants in reducing stress and improving growth and development [19]. Recently, there has been increased interest in beneficial rhizobacterium associated with cereal crops, and several studies have clearly demonstrated the positive and beneficial effects of plant growth promoting rhizobacteria (PGPR) on growth and yield of various crops, especially wheat [20]. Several beneficial free-living rhizobacteria have been termed as PGPR, including,

but not limited to *Acinetobacter*, *Acetobacter*, *Alcaligenes*, *Arthrobacter*, *Azotobacter*, *Azospirillum*, *Bacillus*, *Burkholderia*, *Beijerinckia*, *Enterobacter*, *Flavobacterium*, *Methylobacterium*, *Pseudomonas*, *Rhizobium*, *Paenibacillus* and *Pantoea* [21].

Accumulations of different antibiotics, including sulfonamides harmed the function and activity of microorganism and reduce soil enzymatic activity. Antibiotics in soil can bring constant changes in organisms and plants and exert harmful impacts on soil microbes and their functions which are important for decomposition and nutrient cycling. Antibiotic residues are considered among one of those factors which have adverse effects on the microbial processes in the environment [22]. Antibiotic accumulations, especially sulfonamides, harm microorganism function and activity and diminish soil enzymatic activity. Antibiotics contained in soil can cause organisms and plants to undergo continuous modifications and this could harm soil bacteria and their functions, which are critical for decomposition and nutrient cycling [23]. Sulfonamides delay the assembly of dihydropteroate of folic acid, which reduces bacterial reproduction [24]. Antibiotics may potentially have an impact on the diversity of soil microorganisms [25], soil microbial action [26], enzyme activity [27], and carbon and nitrogen cycling [28]. The impacts of sulfonamides on the functional, structural, and genetic diversity of soil microorganisms have been reported in earlier study [29]. Previous research has shown that most of the antibiotics released into the agricultural environment come from the direct application of organic manure, which affects microbial communities.

Abiotic and biotic stressors can change plant-pest interactions by increasing the susceptibility of plants to pathogenic microbes and insects [30], which interfere with the action of plant growth-promoting rhizospheric bacteria essential for plant growth and as well as suppress the diseases [31]. This study was conducted to infer impact of four newly synthesized sulfonamides on isolated native strains from rhizosphere of wheat cultivar 'Chakwal-50'. Furthermore, present research focused on the susceptibility of soil microbes and microbial respiration in the rhizospheric soil of wheat.

## Materials and methods

### Experimental site

The current study was conducted at Botanical Garden, University of the Punjab, Lahore, Pakistan (31°30'7.35"N and 74°16'57.35"E latitude and longitude). The physical and chemical properties of soil were analyzed before the experiment. Soil analysis revealed that the experiment soil had 5.9 pH, EC was 1.9 dS m<sup>-1</sup>, organic matter content was 0.89%, available nitrogen was 0.2%, available potassium was 139 mg/kg, available phosphorus was 2.5 mg/kg and saturation was 44%. The soil had loamy texture.

### Sample collection

The four new sulfonamide derivatives, i.e., 2-(phenylsulfonyl) hydrazinecarbothioamide (TSBS-1), N, 2 bis (phenylhydrazine) carbothioamide (TSBS-2), (aminocarbonyl) benzene sulfonamide (UBS-1) and N, N' carbonyldibenzene sulfonamide (UBS-2) were obtained from School of Chemistry, University of Punjab, Lahore, Pakistan.

Soil samples were collected from the rhizospheric area of wheat (*Triticum aestivum* L.) variety 'Chakwal-50' for isolation of bacteria. Five isolated bacterial strains, i.e., AC (*Actinobacter spp.*), RS-3a (*Bacillus spp.*), RS-7a (*Bacillus subtilis*), RS-4a (*Enterobacter spp.*) and RS-5a (*Enterobacter spp.*) isolated from the wheat rhizosphere were included in the study. These strains belonged to Microbiology laboratory, Institute on Botany, University of the Punjab, Lahore, Pakistan. Strains were kept at 80 °C and revived in nutrient broth at 30 °C for 48 hours.

Bacterial suspensions were prepared as per McFarland's standard. One-day-old bacterial cultures were used for the preparation of inoculums and maintained at  $1.5 \times 10^8$  [32]. Four dilutions, i.e., 2.25, 2.5, 3, and 4 mg/ml of each sulfonamide derivatives were prepared in DMSO for antibacterial assay and soil microbial respiration test. The experiment was laid out according to completely randomized design (CRD) with three replicates. Five bacterial strains were tested against different sulfonamides and their 4 different doses.

### Antibacterial assay

The antibacterial assay was done by disc diffusion method by using four different concentrations (2.25, 2.5, 3, and 4 mg/ml) against all bacterial strains. Ciprofloxacin used as a standard drug was regarded as positive control, while DMSO (dimethyl sulfoxide) as negative control [33]. In disc diffusion method, agar plants were inoculated with standardized inoculum by spreading 100  $\mu$ L of bacterial suspensions onto Petri plates. After the dilution's preparation, 5  $\mu$ L of desired dilution of antibiotic was loaded on 6 mm filter paper disc individually. Afterwards, Petri plates were inverted to prevent moisture, and incubated at 37 °C for 24 hours. All the tests were repeated four times. The antibacterial action was detected after incubation and assessed as inhibition zone with transparent ruler from back of the plate [34].

### Soil respiration test

Fifty (50) grams of soil samples were put in plastic cups and loaded with each sulfonamide solution, separately. Further, 1 mL of 0.1 M glucose solution and 10 mL of distilled water were also added to maintain the soil moisture at 25%. The test soil was kept overnight. Another cup was filled with 20 mL of 0.15 N NaOH. These plastic cups with test soil and sodium hydroxide were placed in an air-tight jar and incubated at 25 °C in darkness. The control had a blank plastic cup without soil but 20 mL of 0.15 N NaOH. The soil respiration value ( $\text{CO}_2$ ) was calculated by titration of NaOH present in the bottommost of each jar with 0.1 N HCl. The titration was done after different days of interval (3, 6, 9, 12, 16, and 20 days). Each treatment has four replicates.

The value of soil respiration was determined by the formula according to Yao et al. [35].

$$\text{Respiration value (mg CO}_2\text{ g}^{-1}\text{ dry soil)} = \text{Blank-titer}/0.1/44/50$$

### Statistical analysis

The data obtained for different characters were tested for normality which indicated that data had a normal distribution. Two-way analysis of variance was used to test the significance in the data. Duncan's multiple range post-hoc test was used to observe the differences ( $p \leq 0.05$ ) among means where ANOVA indicated significant differences. All statistical analysis were carried out on SPSS statistical software.

## Results

### Antibacterial assay

Results for antibacterial assay of all sulfonamide derivatives show that all antibiotics exerted negative impact on rhizospheric bacteria (Table 1). All sulfonamide derivatives exhibited antibacterial activity against tested bacterial strains, except for TSBS-1, which has no antibacterial activity against RS-7a at the lowest concentration (2.25 mg/ml). The results of all treatments

Table 1. Antibacterial activity of newly derived sulfonamides by disc diffusion method against five different rhizospheric bacteria.

| Sulfonamides  | Concentration<br>(mg/ml) | Bacterial strains diameter of zone of inhibition (mm $\pm$ SD) |                  |                  |                  |                  |
|---------------|--------------------------|----------------------------------------------------------------|------------------|------------------|------------------|------------------|
|               |                          | AC                                                             | RS-3a            | RS-7a            | RS-4a            | RS-5a            |
| TSBS-1        | 2.25                     | 6.33 $\pm$ 0.57                                                | 6.58 $\pm$ 1.52  | 0                | 6.65 $\pm$ 0.73  | 6.16 $\pm$ 0.53  |
|               | 2.5                      | 7.81 $\pm$ 0.96                                                | 7.64 $\pm$ 0.77  | 6.81 $\pm$ 0.83  | 7.75 $\pm$ 0.78  | 7.46 $\pm$ 0.64  |
|               | 3                        | 8.75 $\pm$ 0.41                                                | 8.44 $\pm$ 0.36  | 7.46 $\pm$ 0.50  | 8.55 $\pm$ 0.30  | 8.29 $\pm$ 0.36  |
|               | 4                        | 10.59 $\pm$ 0.62                                               | 9.94 $\pm$ 0.07  | 8.83 $\pm$ 0.76  | 10.07 $\pm$ 0.64 | 9.57 $\pm$ 0.27  |
| TSBS-2        | 2.25                     | 6.07 $\pm$ 0.87                                                | 6.24 $\pm$ 0.32  | 5.43 $\pm$ 0.49  | 6.30 $\pm$ 0.519 | 6.21 $\pm$ 0.92  |
|               | 2.5                      | 7.151 $\pm$ 1.03                                               | 7.11 $\pm$ 1.08  | 6.81 $\pm$ 0.83  | 7.75 $\pm$ 0.78  | 7.67 $\pm$ 0.74  |
|               | 3                        | 8.41 $\pm$ 1.51                                                | 8.70 $\pm$ 0.41  | 8.74 $\pm$ 1.09  | 9.07 $\pm$ 0.88  | 8.64 $\pm$ 0.62  |
|               | 4                        | 10.66 $\pm$ 1.16                                               | 9.89 $\pm$ 0.67  | 9.46 $\pm$ 1.23  | 10.64 $\pm$ 0.24 | 9.99 $\pm$ 0.97  |
| UBS-1         | 2.25                     | 6.78 $\pm$ 1.06                                                | 6.33 $\pm$ 0.93  | 5.65 $\pm$ 1.13  | 6.48 $\pm$ 0.40  | 6.66 $\pm$ 0.41  |
|               | 2.5                      | 7.49 $\pm$ 0.48                                                | 7.69 $\pm$ 1.09  | 6.99 $\pm$ 0.94  | 7.36 $\pm$ 0.52  | 7.70 $\pm$ 1.12  |
|               | 3                        | 8.95 $\pm$ 1.35                                                | 8.11 $\pm$ 0.75  | 8.66 $\pm$ 0.57  | 9.4 $\pm$ 0.25   | 9.12 $\pm$ 0.27  |
|               | 4                        | 11.29 $\pm$ 1.16                                               | 10.91 $\pm$ 0.92 | 10.66 $\pm$ 1.16 | 11.47 $\pm$ 0.90 | 11.01 $\pm$ 1.62 |
| UBS-2         | 2.25                     | 7.07 $\pm$ 0.53                                                | 7.12 $\pm$ 0.45  | 6.23 $\pm$ 0.49  | 7.35 $\pm$ 0.92  | 6.95 $\pm$ 1.91  |
|               | 2.5                      | 8.01 $\pm$ 1.21                                                | 7.67 $\pm$ 2.07  | 7.37 $\pm$ 0.45  | 8.16 $\pm$ 1.60  | 8.04 $\pm$ 1.40  |
|               | 3                        | 9.32 $\pm$ 1.42                                                | 8.77 $\pm$ 1.06  | 8.66 $\pm$ 0.32  | 8.89 $\pm$ 0.18  | 8.89 $\pm$ 1.01  |
|               | 4                        | 10.99 $\pm$ 1.01                                               | 10.66 $\pm$ 0.58 | 10.78 $\pm$ 0.45 | 10.92 $\pm$ 1.83 | 11.05 $\pm$ 1.23 |
| Ciprofloxacin | 4                        | 9.97 $\pm$ 1.11                                                | 9.43 $\pm$ 0.68  | 10.01 $\pm$ 1.26 | 9.91 $\pm$ 1.66  | 10.03 $\pm$ 1.02 |
| DMSO          | 4                        | -                                                              | -                | -                | -                | -                |

TSBS-1 {2-(phenylsulfonyl) hydrazine carbothioamide}, TSBS-2 {N,2-bis phenyl hydrazine carbothioamide}, UBS-1 {(aminocarbonyl) benzene sulfonamide}, UBS-2 {N, N' (carbonyl) dibenzene sulfonamide}, AC (*Actinobacteria* sp.), RS-3a (*Bacillus* sp.), RS-7a (*Bacillus subtilis*), RS-4a (*Enterobacter* sp.) and RS-5a (*Enterobacter* sp.), DMSO (Dimethyl sulfoxide) values are in mean  $\pm$  SD.

<https://doi.org/10.1371/journal.pone.0264476.t001>

were compared with ciprofloxacin, a standard antibiotic, as a positive control and dimethyl sulfoxide (DMSO), a negative control. The DMSO had no antibacterial activity.

In comparison of all sulfonamide derivatives UBS-1 exhibited the highest inhibition zone (11.47  $\pm$  0.90 mm) against RS-4a at the highest concentration (4 mg/ml). Furthermore, all other strains, including AC, RS-3a, RS-7a, and RS-5a found susceptible to UBS-1 with inhibition zones of 11.29  $\pm$  1.16, 10.91  $\pm$  0.92, 10.66  $\pm$  1.16, and 11.01  $\pm$  1.62, respectively.

However, UBS-2 has greater antibacterial potential against RS-7a and RS-5a with inhibition zone of 10.01  $\pm$  1.26 and 10.03  $\pm$  1.02, respectively at 4 mg/ml concentration. The zone of inhibition in both tested bacterial strains was significantly higher with respect to other strains and sulfonamide derivatives.

### Soil microbial respiration (CO<sub>2</sub> mg/g dry soil)

All sulfonamides had negative effect on soil microbial respiration. The results of this study revealed that sulfonamide derivatives inhibit microbial respiration which was time and concentration dependent. Soil respiration values increased significantly till 6<sup>th</sup> day; however, 6<sup>th</sup> day after exposure to sulfonamide derivatives, soil respiration decreased significantly ( $p < 0.05$ ).

The effective concentration in the first 3 days was calculated as 4 mg/ml for UBS-1 with an average value of 1.6 (CO<sub>2</sub> mg/g dry soil), while little effects were observed at other concentrations (Fig 1). Within 4–6 days, each sulfonamide derivative showed significant increases in soil respiration activity, but substantial differences were only seen at the higher concentrations. On



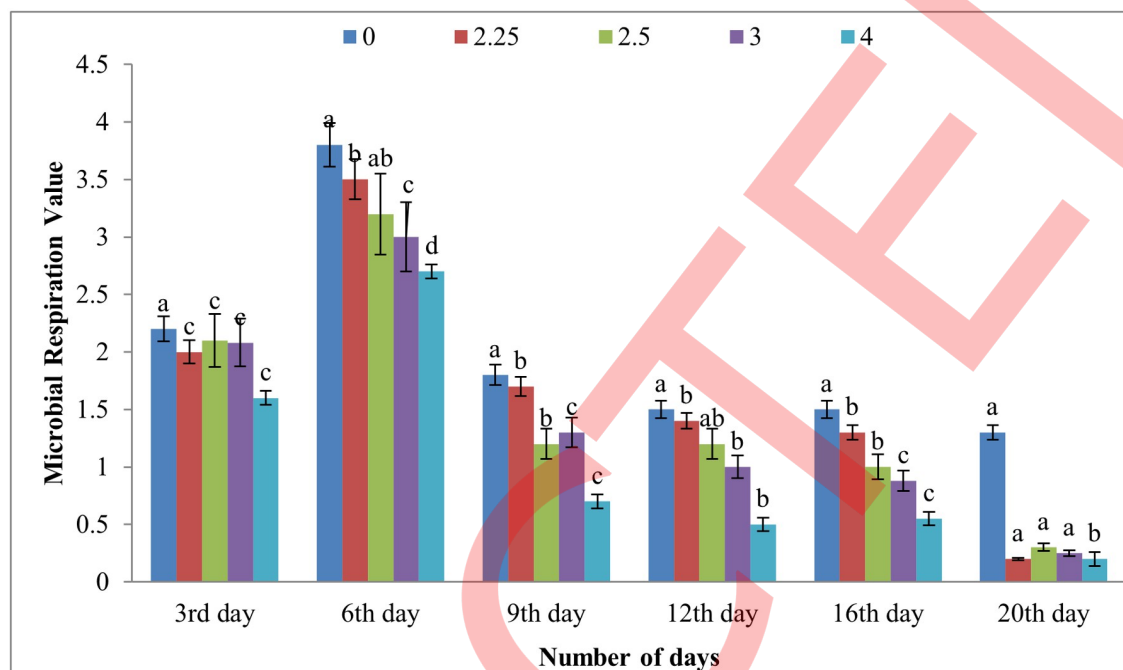

**Fig 1.** Alteration in microbial respiration in the soil due to UBS-1 exposure at different incubation durations (3, 6, 9, 12, 16 and 20 days),  $n = 4$ , vertical bars represent means  $\pm$  standard errors of means. Means sharing different letters are statistically significant ( $p < 0.05$ ).

<https://doi.org/10.1371/journal.pone.0264476.g001>

the other hand, soil microbial respiration dropped dramatically on days 7–9, but a considerable decrease was recorded for the TSBS-1 value of 0.67 (CO<sub>2</sub> mg/g dry soil).

When compared to other incubation periods, the inhibition rates were quite variable on days 10–12 and 13–16; however, there was no significant difference between 12<sup>th</sup> and 16<sup>th</sup> day at each concentration level. However, at a high concentration level (4 mg/ml), the results were substantial for UBS-1, with a 0.5 inhibition rate on day 12 (Fig 1) and a 0.4 inhibition rate for UBS-2 on day 16 (Fig 2).

In contrast to the activities in the first few days, a major decrease in respiration activity was observed in later incubation periods. Soil respiration activity was markedly hindered towards the end of incubation period even at small concentrations. Microbial respiration activity diminished as the concentration of each treatment and time of exposure increased.

Based on the concentrations (4 mg/ml) and time (20 days), poor respiration activity was noted at 0.23, 0.2, and 0.4 (CO<sub>2</sub> mg/g dry soil) for TSBS-1, UBS-1, and UBS-2, respectively (Figs 1–3). The results of TSBS-2 at 3 mg/ml were more significant than 4 mg/ml, with mean values of 0.29 (CO<sub>2</sub> mg/g dry soil) and 0.4 (CO<sub>2</sub> mg/g dry soil), respectively (Fig 4).

## Discussion

In this study we focused on four novel synthetic sulfonamides, i.e., TSBS-1 {2-(phenylsulfonyl) hydrazine carbothioamide}, TSBS-2 {N,2-bis phenylhydrazine carbothioamide}, UBS-1 {(aminocarbonyl) benzene sulfonamide}, and UBS-2 {N,N' (carbonyl) dibenzene sulfonamide}.

Table 1 reveals that all sulfonamide derivatives have negative effect on soil microbes with statistically significant differences. Previous literature also indicated that Gram-negative and

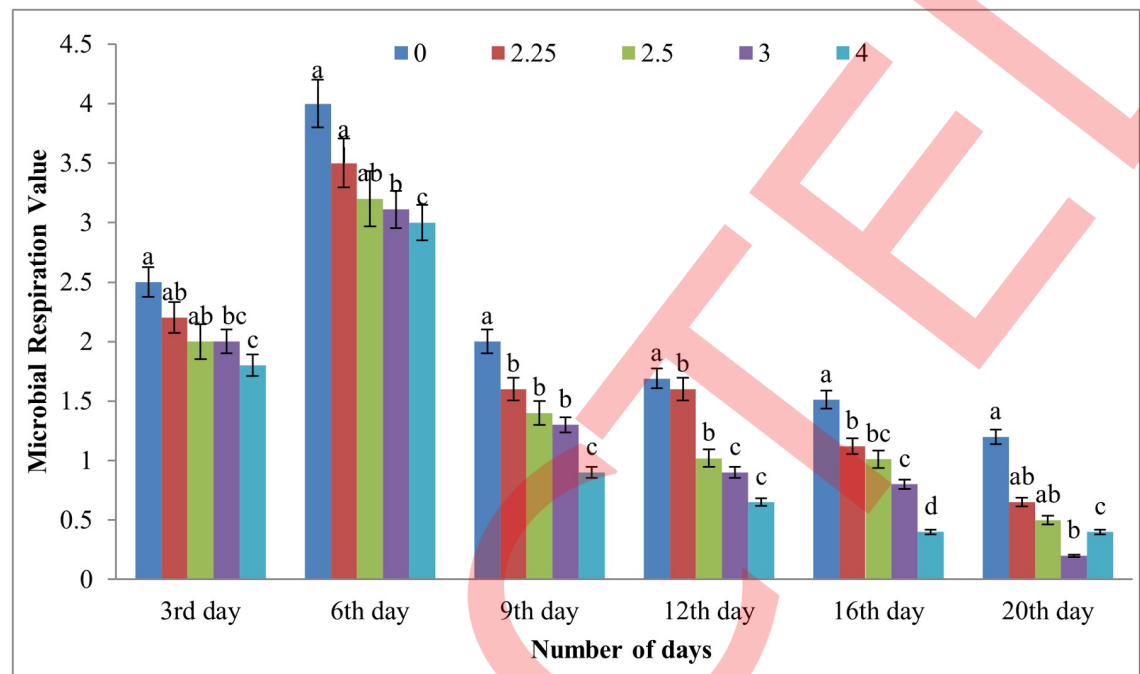

**Fig 2. Alteration in microbial respiration in the soil due to UBS-2 exposure at different incubation durations (3, 6, 9, 12, 16 and 20 days),  $n = 4$ , vertical bars represent means  $\pm$  standard errors of means. Means sharing different letters are statistically significant ( $p < 0.05$ ).**

<https://doi.org/10.1371/journal.pone.0264476.g002>

Gram-positive bacteria are susceptible to sulfonamides. They are synthetic antimicrobials with the ability to impede the microbe's folic acid pathway [36].

All synthesized sulfonamides inhibited the growth of isolated bacterial strains even at low concentration (2.25 mg/ml) except for TSBS-1 against RS-7a and did not show any inhibition zone at 2.25 mg/ml. However, all other bacteria were found susceptible to TSBS-1. Sulfonamides are a synthetic drug with a wide range of activity against all positive and negative bacteria, protozoa, and toxoplasma [37]. Sulfonamides exert their effect by targeting dihydropteroate synthase (DHPS) enzyme, which catalyzes the folic acid pathway in bacteria and results in the stoppage of folate biosynthesis in microorganism cells; thus, restraining microorganism growth [38].

Soil respiration measured as cumulative  $\text{CO}_2$  decreased significantly with increasing concentrations of sulfonamide for up to 3 days only (Figs 1–4). Soil respiration significantly decreased with increasing concentrations of sulfamethoxazole and trimethoprim in the soil [39]. The earlier study also discovered that antibiotic sulfadiazine inhibited microbial activity in manure for up to 4 days after application, and that the effective doses for sulfamethoxazole in the first 2 days were calculated to be 7 mg/kg. Antibiotics may potentially have an impact on the diversity of soil microorganisms [25], soil microbial action [26], enzyme activity [27].

Until the 6<sup>th</sup> day, the levels of soil respiration greatly increased. Previous research has also found an increase in soil respiratory activity [40]. Each sulfonamide derivative demonstrated statistically significant increases in soil respiration activity within 4–6 days in our investigation. Our findings are consistent with Thiele-Bruhn et al. [41]. According to Thiele-Bruhn et al. [41], increasing soil respiration is linked to a decrease in the amount of antibiotics that are available, as well as increased microorganism adaption and resistance. The impacts of

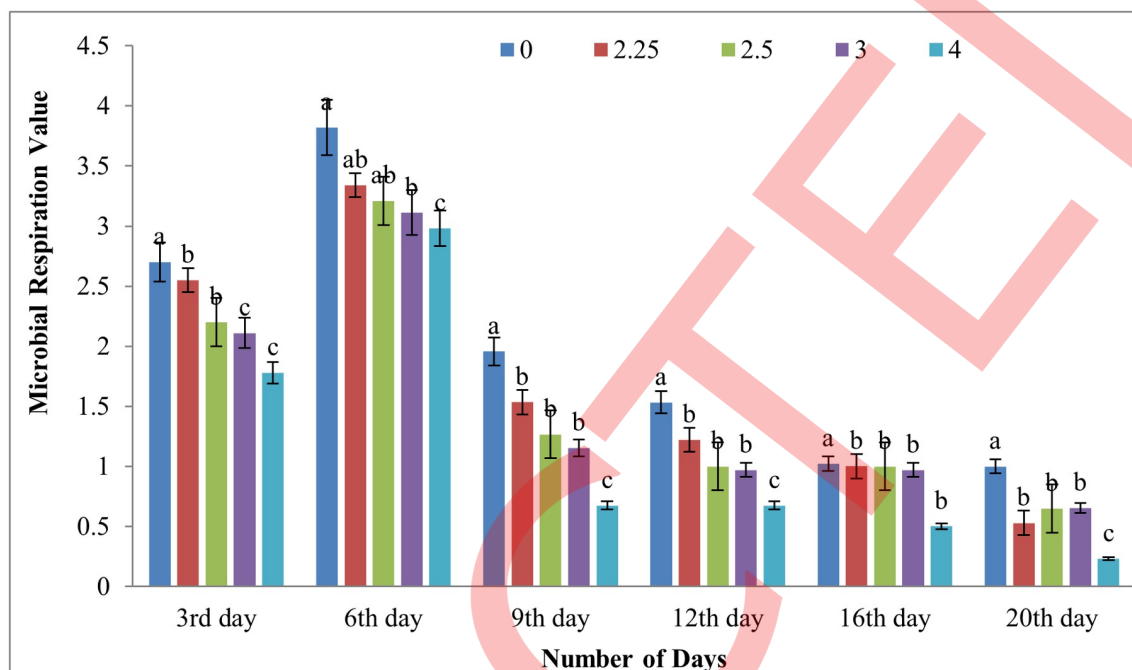

**Fig 3.** Alteration in microbial respiration in the soil due to TSBS-1 exposure at different incubation durations (3, 6, 9, 12, 16 and 20 days),  $n = 4$ , vertical bars represent means  $\pm$  standard errors of means. Means sharing different letters are statistically significant ( $p < 0.05$ ).

<https://doi.org/10.1371/journal.pone.0264476.g003>

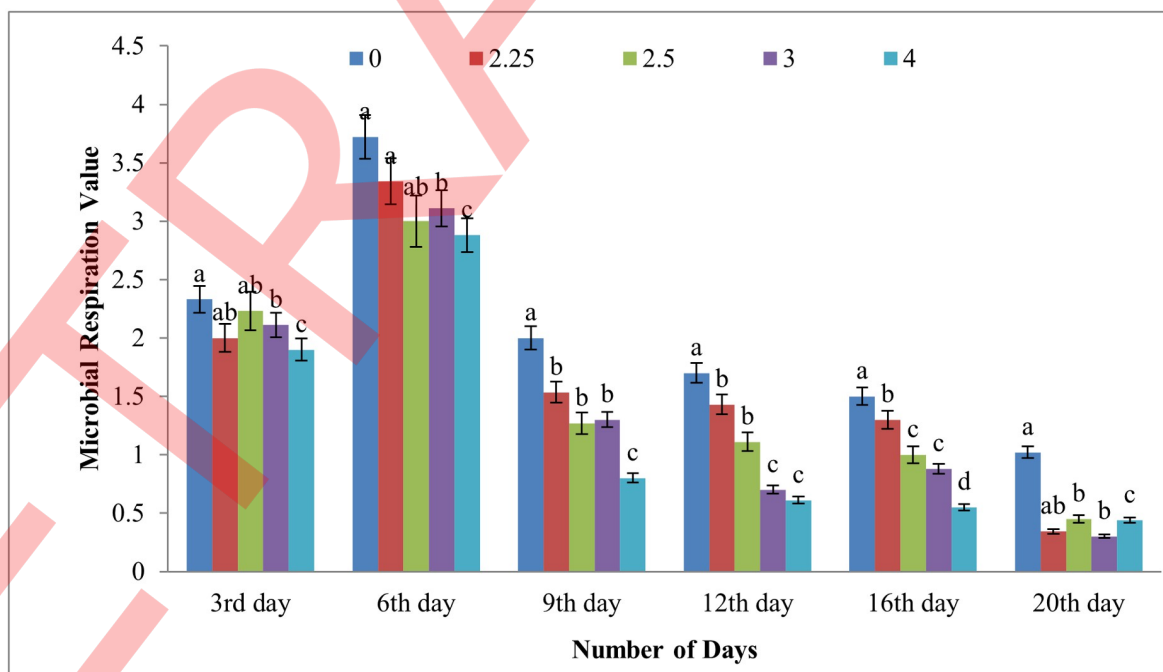

**Fig 4.** Alteration in microbial respiration in the soil due to TSBS-2 exposure at different incubation durations (3, 6, 9, 12, 16 and 20 days),  $n = 4$ , vertical bars represent means  $\pm$  standard errors of means. Means sharing different letters are statistically significant ( $p < 0.05$ ).

<https://doi.org/10.1371/journal.pone.0264476.g004>



sulfonamides on the functional, structural, and genetic diversity of soil microorganisms have also been reported [29].

After 6<sup>th</sup> day exposure of sulfonamide derivatives to the soil (9, 12, 16, 20 day), the soil respiration decreased significantly ( $p < 0.05$ ). Soil respiration activity was markedly hindered towards the end of the day even at small concentrations. In comparison to antibiotic concentrations (up to 91 mg/kg) in manure and soils [42], inhibitory effects from antibiotics such sulfonamides in the environment are more expected. Soil respiration activity is important for higher production of wheat. Several abiotic stresses are already affecting the productivity of different crops including wheat [43–47]. Therefore, antibiotics should be carefully monitored and their impact on plant growth should be quantified in the future studies.

## Conclusions

The varied terrestrial toxicological effects of sulfonamide antibiotics were investigated using several bioassays, including antibacterial assay and soil respiration. In conclusion, (aminocarbonyl) benzene sulfonamide (UBS-1) exhibited highest zone of inhibition against all tested bacterial strains. Soil respiration activity was markedly hindered towards the end of the incubation period even at small concentrations of TSBS-1 {2-(phenylsulfonyl) hydrazine carbothioamide}, TSBS-2 {N, 2-bis phenyl hydrazine carbothioamide}, UBS-1 {(aminocarbonyl) benzene sulfonamide}, and UBS-2 {N,N' (carbonyl) dibenzene sulfonamide}. The results of this study can be applied to the environmental risk assessment of sulfonamide, including estimation of the determination of sulfonamide in the environment. Sulfonamides have a negative influence on the soil microbiome, and some soil microorganisms that are unable to resist such stressors, so it is difficult to retain soil fertility and plant development as well. Soil microbial respiration changes mediated by sulfonamides were dependent on length of exposure and concentration. It is recommended that antibiotics should be carefully watched and their impact on plant growth should be tested in the future studies.

## Acknowledgments

This study was impossible without the cooperation of the management of the Institute of Botany, University of the Punjab, Lahore, where sampling was carried out, and is highly acknowledged by the authors. The authors extend their appreciation to the Researchers Supporting Project, King Saud University, Riyadh, Saudi Arabia.

## Author Contributions

**Conceptualization:** Asma Zulfiqar, Muhammad Tajammal Khan, Marek Zivcak, Ali Tan Kee Zuan, Shrouq M. Alshahrani, Khaloud Mohammed Alarjani.

**Data curation:** Ammara Saleem.

**Formal analysis:** Muhammad Zeeshan Arshed, Muhammad Tajammal Khan.

**Funding acquisition:** Asma Zulfiqar, Ali Tan Kee Zuan, Shrouq M. Alshahrani, Khaloud Mohammed Alarjani.

**Investigation:** Muhammad Zeeshan Arshed.

**Methodology:** Ammara Saleem.

**Project administration:** Asma Zulfiqar.

**Software:** Saber Hussain.

**Supervision:** Asma Zulfiqar.

**Validation:** Ammara Saleem, Muhammad Zeeshan Arshed, Saber Hussain.

**Visualization:** Ammara Saleem, Muhammad Zeeshan Arshed, Saber Hussain, Muhammad Tajammal Khan.

**Writing – original draft:** Ammara Saleem.

**Writing – review & editing:** Asma Zulfiqar, Muhammad Zeeshan Arshed, Saber Hussain, Muhammad Tajammal Khan, Marek Zivcak, Ali Tan Kee Zuan, Shrouq M. Alshahrani, Khaloud Mohammed Alarjani.

## References

1. Du Lianfeng, and Liu Wenke. Occurrence, fate, and ecotoxicity of antibiotics in agro-ecosystems. A review. *Agronomy for sustainable development*. 2012. 32(2), 309–327.
2. Sarmah Ajit K., Meyer Michael T., and Boxall Alistair BA. A global perspective on the use, sales, exposure pathways, occurrence, fate and effects of veterinary antibiotics (VAs) in the environment. *Chemosphere*. 2006. 65(5), 725–759. <https://doi.org/10.1016/j.chemosphere.2006.03.026> PMID: 16677683
3. Hou J, Chen Z, Gao J, Xie Y, Li L, Qin S, Wang Q, Mao D, Luo Y. Simultaneous removal of antibiotics and antibiotic resistance genes from pharmaceutical wastewater using the combinations of up-flow anaerobic sludge bed, anoxic-oxic tank, and advanced oxidation technologies. *Water research*. 2019. 159:511–20. <https://doi.org/10.1016/j.watres.2019.05.034> PMID: 31129481
4. Kemper N. Veterinary antibiotics in the aquatic and terrestrial environment. *Ecological indicators*. 2008. 8(1):1–3.
5. Kim KR, Owens G, Kwon SI, So KH, Lee DB, Ok YS. Occurrence and environmental fate of veterinary antibiotics in the terrestrial environment. *Water, Air, & Soil Pollution*. 2011. 214(1):163–74.
6. Liu F, Ying GG, Tao R, Zhao JL, Yang JF, Zhao LF. Effects of six selected antibiotics on plant growth and soil microbial and enzymatic activities. *Environmental pollution*. 2009. 157(5):1636–42. <https://doi.org/10.1016/j.envpol.2008.12.021> PMID: 19157661
7. Jin C, Fan J, Liu R, Sun R. Single and joint toxicity of sulfamonomethoxine and cadmium on three agricultural crops. *Soil and Sediment Contamination: An International Journal*. 2015. 24(4):454–70.
8. Jjemba Patrick K. The effect of chloroquine, quinacrine, and metronidazole on both soybean plants and soil microbiota. *Chemosphere*. 2002. 46(7) 1019–1025. [https://doi.org/10.1016/s0045-6535\(01\)00139-4](https://doi.org/10.1016/s0045-6535(01)00139-4) PMID: 11999765
9. Jechalke S, Heuer H, Siemens J, Amelung W, Smalla K. Fate and effects of veterinary antibiotics in soil. *Trends in microbiology*. 2014. 22(9):536–45. <https://doi.org/10.1016/j.tim.2014.05.005> PMID: 24950802
10. Gelband H, Molly Miller P, Pant S, Gandra S, Levinson J, Barter D, et al. The state of the world's antibiotics 2015. *Wound healing southern africa*. 2015. 8(2):30–4.
11. Klein EY, Van Boeckel TP, Martinez EM, Pant S, Gandra S, Levin SA, et al. Global increase and geographic convergence in antibiotic consumption between 2000 and 2015. *Proceedings of the National Academy of Sciences*. 2018. 115(15):E3463–70. <https://doi.org/10.1073/pnas.1717295115> PMID: 29581252
12. Van Doorslaer X., Dewulf J., Van Langenhove H., & Demeestere K. Fluoroquinolone antibiotics: an emerging class of environmental micropollutants. *Science of the Total Environment*. 2014. 250–269. <https://doi.org/10.1016/j.scitotenv.2014.08.075> PMID: 25226071
13. Martínez-Carballo E, González-Barreiro C, Scharf S, Gans O. Environmental monitoring study of selected veterinary antibiotics in animal manure and soils in Austria. *Environmental Pollution*. 2007. 148(2):570–9. <https://doi.org/10.1016/j.envpol.2006.11.035> PMID: 17291647
14. Yang R, Liang X, Torrión JA, Walsh OS, O'Brien K, Liu Q. The influence of water and nitrogen availability on the expression of end-use quality parameters of spring wheat. *Agronomy*. 2018. 8(11):257.
15. Abhinandan K, Skori L, Stanic M, Hickerson N, Jamshed M, Samuel MA. Abiotic stress signaling in wheat—an inclusive overview of hormonal interactions during abiotic stress responses in wheat. *Frontiers in plant science*. 2018. 11(9):734. <https://doi.org/10.3389/fpls.2018.00734> PMID: 29942321
16. Berg G, Smalla K. Plant species and soil type cooperatively shape the structure and function of microbial communities in the rhizosphere. *FEMS microbiology ecology*. 2009. 1; 68(1):1–3. <https://doi.org/10.1111/j.1574-6941.2009.00654.x> PMID: 19243436

17. Velázquez-Sepúlveda I., Orozco-Mosqueda M. C., Prieto-Barajas C. M., & Santoyo G. (2012). Bacterial diversity associated with the rhizosphere of wheat plants (*Triticum aestivum*): Toward a metagenomic analysis. *Phyton*, 81, 81.
18. Gałązka A, Grzęda E, Jończyk K. Changes of microbial diversity in rhizosphere soils of new quality varieties of winter wheat cultivation in organic farming. *Sustainability*. 2019. 11(15):4057.
19. Pathania P, Bhatia R, Khatri M. Cross-competence and affectivity of maize rhizosphere bacteria *Bacillus* sp. MT7 in tomato rhizosphere. *Scientia Horticulturae*. 2020. 15; 272:109480.
20. Zhang J, Liu J, Meng L, Ma Z, Tang X, Cao Y, et al. Isolation and characterization of plant growth-promoting rhizobacterium from wheat roots by wheat germ agglutinin labeled with fluoresce in isothiocyanate. *The Journal of Microbiology*. 2012. 50(2):191–8. <https://doi.org/10.1007/s12275-012-1472-3> PMID: 22538646
21. Chanway CP, Nelson LM, Holl FB. Cultivar-specific growth promotion of spring wheat (*Triticum aestivum* L.) by coexistent *Bacillus* species. *Canadian journal of microbiology*. 1988 Jul 1; 34(7):925–9.
22. Yadav S, Modi P, Dave A, Vijapura A, Patel D, Patel M. Effect of abiotic stress on crops. *Sustainable Crop Production*. 2020.
23. Kumar K, Gupta SC, Chander Y, Singh AK. Antibiotic use in agriculture and its impact on the terrestrial environment. *Advances in agronomy*. 2005. 1(87):1–54.
24. Demoling LA, Bååth E, Greve G, Wouterse M, Schmitt H. Effects of sulfamethoxazole on soil microbial communities after adding substrate. *Soil Biology and Biochemistry*. 2009. 41(4):840–8.
25. Xu Y, Guo C, Luo Y, Lv J, Zhang Y, Lin H, et al. Occurrence and distribution of antibiotics, antibiotic resistance genes in the urban rivers in Beijing, China. *Environmental pollution*. 2016. 213:833–40. <https://doi.org/10.1016/j.envpol.2016.03.054> PMID: 27038570
26. Liu A, Cao H, Yang Y, Ma X, Liu X. Combinational effects of Sulfamethoxazole and copper on soil microbial community and function. *Environmental Science and Pollution Research*. 2016. 23(5):4235–41. <https://doi.org/10.1007/s11356-015-4892-x> PMID: 26122574
27. Ma T, Pan X, Liu W, Christie P, Luo Y, Wu L. Effects of different concentrations and application frequencies of oxytetracycline on soil enzyme activities and microbial community diversity. *European Journal of Soil Biology*. 2016. 1(76):53–60.
28. Reichel R, Rosendahl I, Peeters ET, Focks A, Groeneweg J, Bierl R, et al. Effects of slurry from sulfadiazine-(SDZ) and difloxacin-(DIF) medicated pigs on the structural diversity of microorganisms in bulk and rhizosphere soil. *Soil Biology and Biochemistry*. 2013. 1(62):82–91.
29. Pandey P, Irulappan V, Bagavathiannan MV, Senthil-Kumar M. Impact of combined abiotic and biotic stresses on plant growth and avenues for crop improvement by exploiting physio-morphological traits. *Frontiers in plant science*. 2017. 18(8):537. <https://doi.org/10.3389/fpls.2017.00537> PMID: 28458674
30. Van Loon LC. Plant responses to plant growth-promoting rhizobacteria. In *New perspectives and approaches in plant growth-promoting Rhizobacteria research 2007* (pp. 243–254). Springer, Dordrecht.
31. Cycon M, Mroziak A, Piotrowska-Seget Z. Antibiotics in the soil environment degradation and their impact on microbial activity and diversity. *Frontiers in microbiology*. 2019. 10:338. <https://doi.org/10.3389/fmicb.2019.00338> PMID: 30906284
32. Swenson JM, Thornsberry CL. Preparing inoculum for susceptibility testing of anaerobes. *Journal of clinical microbiology*. 1984. 19(3):321–5. <https://doi.org/10.1128/jcm.19.3.321-325.1984> PMID: 6715509
33. Hudzicki, Jan. Kirby-Bauer disk diffusion susceptibility test protocol. 2009.
34. Heatley NG. A method for the assay of penicillin. *Biochemical Journal*. 1944. 38(1):61–5. <https://doi.org/10.1042/bj0380061> PMID: 16747749
35. Yao XH, Min H, Lü ZH, Yuan HP. Influence of acetamiprid on soil enzymatic activities and respiration. *European Journal of Soil Biology*. 2006. 42(2):120–6.
36. Alaboudi AR. Antimicrobial residues in table eggs. In *Egg Innovations and Strategies for Improvements*. 2017. (pp. 447–456). Academic Press.
37. Hirsh DC, Veterinary microbiology. Enterobacteriaceae: Yersinia. *Veterinary microbiology*. 2nd ed. Ames (IA): Blackwell. 2004. 75–80.
38. Katzung B.G. Basic & Clinical Pharmacology. McGraw-Hill, New York. 2007
39. Kotzerke A, Sharma S, Schauss K, Heuer H, Thiele-Bruhn S, Smalla K, et al. Alterations in soil microbial activity and N-transformation processes due to sulfadiazine loads in pig-manure. *Environmental Pollution*. 2008. 153(2):315–22. <https://doi.org/10.1016/j.envpol.2007.08.020> PMID: 17905496
40. Schmitt H, van Beelen P, Tolls J, Van Leeuwen CL. Pollution-induced community tolerance of soil microbial communities caused by the antibiotic sulfachloropyridazine. *Environmental science technology*. 2004. 38(4):1148–53. <https://doi.org/10.1021/es034685p> PMID: 14998030

41. Thiele-Bruhn S, Bloem J, de Vries FT, Kalbitz K, Wagg C. Linking soil biodiversity and agricultural soil management. *Current Opinion in Environmental Sustainability*. 2012; 4(5):523–8.
42. Halling-Sørensen B, Sengeløv G, Ingerslev F, Jensen LB. Reduced antimicrobial potencies of oxytetracycline, tylosin, sulfadiazin, streptomycin, ciprofloxacin, and olaquinox due to environmental processes. *Archives of environmental contamination and toxicology*. 2003; 44(1):0007–16.
43. Farooq S, Shahid M, Khan MB, Hussain M, Farooq M. Improving the productivity of bread wheat by good management practices under terminal drought. *J Agron Crop Sci*. 2015; 201: 173–188. <https://doi.org/10.1111/jac.12093>
44. Farooq S, Hussain M, Jabran K, Hassan W, Rizwan MS, Yasir TA. Osmopriming with CaCl<sub>2</sub> improves wheat (*Triticum aestivum* L.) production under water-limited environments. *Environ Sci Pollut Res*. 2017; 24: 13638–13649. <https://doi.org/10.1007/s11356-017-8957-x> PMID: 28391467
45. Hussain M, Farooq S, Hasan W, Ul-Allah S, Tanveer M, Farooq M, et al. Drought stress in sunflower: Physiological effects and its management through breeding and agronomic alternatives. *Agricultural water management*. 2018; 201:152–66.
46. Hussain M, Waqas-ul-Haq M, Farooq S, Jabran K, Farooq M. The impact of seed priming and row spacing on the productivity of different cultivars of irrigated wheat under early season drought. *Experimental Agriculture*. 2016; 52(3): 477–90.
47. Hussain M, Farooq S, Jabran K, Ijaz M, Sattar A, Hassan W. Wheat sown with narrow spacing results in higher yield and water use efficiency under deficit supplemental irrigation at the vegetative and reproductive stage. *Agronomy*. 2016; 6(2):22.
